# Supplementary material
Source: PubMed Central journal article supplement (PMC60096)

**A. PHO85<sup>WT</sup> vs. PHO85<sup>F82G</sup>**

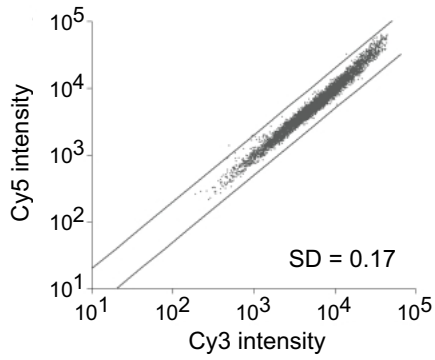

**B. PHO85<sup>WT</sup> 10  $\mu$ M 1-Na PP1**

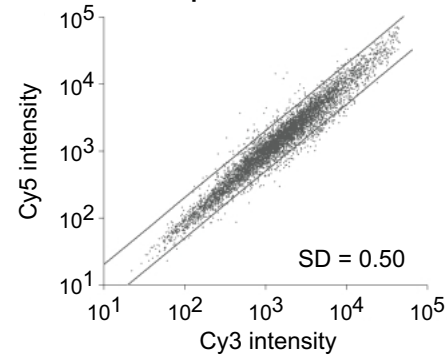

**C. PHO85<sup>F82G</sup> 10  $\mu$ M 1-Na PP1**

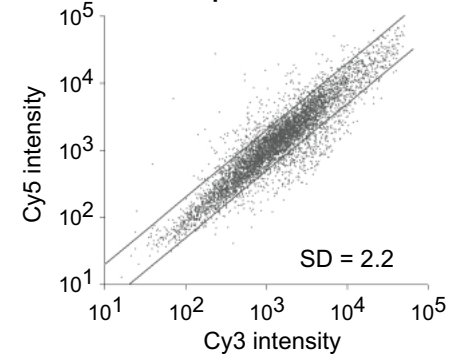

Supplement: pnas_98_22_12578__2.pdf [file pnas_98_22_12578__2.pdf]
